# Supplementary material for: SOCS7/HuR/FOXM1 signaling axis inhibited high-grade serous ovarian carcinoma progression
Source: J Exp Clin Cancer Res. 2022 May 27;41:185. doi: 10.1186/s13046-022-02395-1 (PMC9137060; doi:10.1186/s13046-022-02395-1)
Supplement: Supplementary file 1 — Additional file 1: Supplementary Table 1. HuR/ELAV-like Protein 1 was identified to interact with SOCS7 via liquid chromatography/mass spectrometry (LC/MS). [file 13046_2022_2395_MOESM1_ESM.xlsx]

## Sheet: samll-ID
Accession	Description	Score	Coverage	# Proteins	# Unique Peptides	# Peptides	# PSMs	# AAs	MW [kDa]	calc. pI
Q15717	ELAV (Embryonic Lethal, Abnormal Vision, Drosophila)-Like 1 (Hu Antigen R) OS=Homo sapiens GN=ELAVL1 PE=1 SV=2 - [ELAVL1_HUMAN]	838.11	43.36	3	21	33	41	298	36.09	9.58
P39687	Acidic Nuclear Phosphoprotein 32 Family Member A OS=Homo sapiens GN=ANP32A PE=1 SV=2 - [ANP32A_HUMAN]	538.07	38.13	4	17	24	33	123	28.585	3.72
Q9UIV8	Acyl-protein thioesterase 1 OS=Homo sapiens GN=SERPINB13 PE=1 SV=1 - [SERPINB13_HUMAN]	537.2	34.78	3	16	23	30	230	44.276	5.47
P27707	Deoxycytidine Kinase OS=Homo sapiens GN=DCK PE=1 SV=1 - [DCK_HUMAN]	537.08	34.85	2	15	23	33	206	30.519	4.88
Q92688	Acidic Nuclear Phosphoprotein 32 Family Member B OS=Homo sapiens GN=ANP32B PE=1 SV=1 - [ANP32B_HUMAN]	436.95	25.23	3	14	22	34	172	28.788	3.67
O14787	Transportin 2 OS=Homo sapiens GN=TNPO2 PE=1 SV=2 - [TNPO2_HUMAN]	435.86	29.63	1	14	22	29	135	101.388	4.63
Q15365	Poly(RC) Binding Protein 1 OS=Homo sapiens GN=PCBP1 PE=1 SV=3 - [PCBP1_HUMAN]	334.7	21.42	6	9	18	34	634	37.498	7.11
O95600	Kruppel Like Factor 8 OS=Homo sapiens GN=KLF8 PE=1 SV=2 - [KLF8_HUMAN]	333.95	22.36	4	11	23	34	466	39.314	7.63
Q14974	Karyopherin Subunit Beta 1 OS=Homo sapiens GN=KPNB1 PE=1 SV=1 - [KPNB1_HUMAN]	333.95	23.21	3	6	21	31	218	97.17	4.41
Q92945	KH-Type Splicing Regulatory Protein OS=Homo sapiens GN=KHSRP PE=1 SV=1 - [KHSRP_HUMAN]	333.56	11.83	2	7	20	30	93	73.115	7.34
O43760	Synaptogyrin-2 OS=Homo sapiens GN=SYNGR2 PE=1 SV=1 - [SNG2_HUMAN]	331.58	14.46	8	11	23	33	224	24.7941	4.94482
P31944	Caspase-14 OS=Homo sapiens GN=CASP14 PE=1 SV=2 - [CASPE_HUMAN]	331.04	14.13	7	11	23	34	242	27.662	5.57959
Q96S97	Myeloid-associated differentiation marker OS=Homo sapiens GN=MYADM PE=1 SV=2 - [MYADM_HUMAN]	330.01	13.11	6	10	23	36	322	35.2503	8.14795
P62851	40S ribosomal protein S25 OS=Homo sapiens GN=RPS25 PE=1 SV=1 - [RS25_HUMAN]	329.58	29.44	5	9	18	31	125	13.7337	10.1108
Q9HAV7	GrpE protein homolog 1, mitochondrial OS=Homo sapiens GN=GRPEL1 PE=1 SV=2 - [GRPE1_HUMAN]	229.53	35.64	5	9	18	31	217	24.2639	8.11865
Q9BRJ6	Uncharacterized protein C7orf50 OS=Homo sapiens GN=C7orf50 PE=1 SV=1 - [CG050_HUMAN]	229.29	29.49	3	9	18	31	194	22.0698	9.64209
P24539	ATP synthase F(0) complex subunit B1, mitochondrial OS=Homo sapiens GN=ATP5F1 PE=1 SV=2 - [AT5F1_HUMAN]	228.69	9.03	3	9	20	30	256	28.8903	9.36377
P02452	Collagen alpha-1(I) chain OS=Homo sapiens GN=COL1A1 PE=1 SV=5 - [CO1A1_HUMAN]	228.64	11.68	4	7	18	33	1464	138.857	5.79541
P07910	Heterogeneous nuclear ribonucleoproteins C1/C2 OS=Homo sapiens GN=HNRNPC PE=1 SV=4 - [HNRPC_HUMAN]	128.28	23.61	4	7	19	33	306	33.6495	5.08447
P60174	Triosephosphate isomerase OS=Homo sapiens GN=TPI1 PE=1 SV=3 - [TPIS_HUMAN]	127.52	26.05	5	7	19	31	286	30.7717	5.92236
P11216	Glycogen phosphorylase, brain form OS=Homo sapiens GN=PYGB PE=1 SV=5 - [PYGB_HUMAN]	127.23	12.5	5	6	17	31	843	96.6345	6.85889
P62906	60S ribosomal protein L10a OS=Homo sapiens GN=RPL10A PE=1 SV=2 - [RL10A_HUMAN]	126.46	21.68	5	6	15	21	217	24.8155	9.93506
P06733	Alpha-enolase OS=Homo sapiens GN=ENO1 PE=1 SV=2 - [ENOA_HUMAN]	125.94	22.79	3	6	15	24	434	47.1393	7.38623
Q9NWB6	Arginine and glutamate-rich protein 1 OS=Homo sapiens GN=ARGLU1 PE=1 SV=1 - [ARGL1_HUMAN]	125.78	8.25	3	5	15	22	273	33.1968	10.3452
Q9GZP9	Derlin-2 OS=Homo sapiens GN=DERL2 PE=1 SV=1 - [DERL2_HUMAN]	125.26	24.54	3	5	15	22	239	27.5493	7.28369
Q8NHJ6	Leukocyte immunoglobulin-like receptor subfamily B member 4 OS=Homo sapiens GN=LILRB4 PE=1 SV=3 - [LIRB4_HUMAN]	124.75	11.17	4	5	10	19	448	49.3247	6.66846
P30041	Peroxiredoxin-6 OS=Homo sapiens GN=PRDX6 PE=1 SV=3 - [PRDX6_HUMAN]	123.91	23.61	4	5	10	21	224	25.0192	6.37939
O60832	H/ACA ribonucleoprotein complex subunit 4 OS=Homo sapiens GN=DKC1 PE=1 SV=3 - [DKC1_HUMAN]	92.86	9.84	2	4	10	21	514	57.6378	9.42236
Q00325	Phosphate carrier protein, mitochondrial OS=Homo sapiens GN=SLC25A3 PE=1 SV=2 - [MPCP_HUMAN]	90.78	33.82	2	4	10	21	362	40.0687	9.37842
P18621	60S ribosomal protein L17 OS=Homo sapiens GN=RPL17 PE=1 SV=3 - [RL17_HUMAN]	80.01	19.12	8	4	10	21	184	21.3833	10.1694
Q5SSJ5	Heterochromatin protein 1-binding protein 3 OS=Homo sapiens GN=HP1BP3 PE=1 SV=1 - [HP1B3_HUMAN]	79.08	8.78	5	2	8	15	553	61.1693	9.67139
Q92572	AP-3 complex subunit sigma-1 OS=Homo sapiens GN=AP3S1 PE=1 SV=1 - [AP3S1_HUMAN]	0	29.06	3	1	8	14	193	21.7181	5.38916
P05089	Arginase-1 OS=Homo sapiens GN=ARG1 PE=1 SV=2 - [ARGI1_HUMAN]	73.6216	13.42	3	3	8	14	322	34.7133	7.21045
Q9ULZ3	Apoptosis-associated speck-like protein containing a CARD OS=Homo sapiens GN=PYCARD PE=1 SV=2 - [ASC_HUMAN]	70.1203	15.64	3	3	8	15	195	21.6133	6.34131
Q08211	ATP-dependent RNA helicase A OS=Homo sapiens GN=DHX9 PE=1 SV=4 - [DHX9_HUMAN]	67.528	10.63	4	2	9	14	1270	140.869	6.84424
Q9UBQ5	Eukaryotic translation initiation factor 3 subunit K OS=Homo sapiens GN=EIF3K PE=1 SV=1 - [EIF3K_HUMAN]	57.1347	16.88	4	3	9	14	218	25.0434	4.93213
O95047	Olfactory receptor 2A4 OS=Homo sapiens GN=OR2A4 PE=2 SV=1 - [OR2A4_HUMAN]	56.0872	12.9	5	3	9	14	310	34.7786	8.89502
Q8IY81	pre-rRNA processing protein FTSJ3 OS=Homo sapiens GN=FTSJ3 PE=1 SV=2 - [SPB1_HUMAN]	53.4425	11.06	5	3	9	14	847	96.4992	8.39697
